# Supplementary material for: GOBP1 from the Variegated Cutworm Peridroma saucia (Hübner) (Lepidoptera: Noctuidae) Displays High Binding Affinities to the Behavioral Attractant (Z)-3-Hexenyl acetate
Source: MDPI journal article supplement (doi:10.3390/insects12100939), 2021-10-15
Supplement: s1 [file s1]

**Table S2.** The protein accession numbers of GOBP and PBP sequences used in the phylogenetic tree construction.

| Protein   | Accession number | Species                          |
|-----------|------------------|----------------------------------|
| PsauGOBP1 | MW013058.1       | <i>Peridroma Saucia</i>          |
| MsepGOBP1 | AWT22240.1       | <i>Mythimna separata</i>         |
| AipsGOBP1 | AFM36759.1       | <i>Agrotis ipsilon</i>           |
| AsegGOBP1 | ABI24159.1       | <i>Agrotis segetum</i>           |
| HarmGOBP1 | XP_021192665.1   | <i>Helicoverpa armigera</i>      |
| HvirGOBP1 | PCG66043.1       | <i>Heliothis viresence</i>       |
| SexiGOBP1 | ACY78412.1       | <i>Spodoptera exigua</i>         |
| SinfGOBP1 | AGS36742.1       | <i>Sesamia inferens</i>          |
| SlitGOBP1 | XP_022816701.1   | <i>Spodoptera litura</i>         |
| HassGOBP1 | AAW65076.1       | <i>Helicoverpa assulta</i>       |
| AdisGOBP1 | ALJ93806.1       | <i>Athetis dissimilis</i>        |
| MsexGOBP1 | XP_030028623.1   | <i>Manduca sexta</i>             |
| CpomGOBP1 | AFP66957.1       | <i>Cydia pomonella</i>           |
| CsinGOBP1 | AHY86493.1       | <i>Conopomorpha sinensis</i>     |
| CresGOBP1 | AXN76737.1       | <i>Clostera restituta</i>        |
| PrapGOBP1 | XP_022118428.1   | <i>Pieris rapae</i>              |
| DkikGOBP1 | AGJ83357.1       | <i>Dendrolimus kikuchii</i>      |
| DhouGOBP1 | AGJ83358.1       | <i>Dendrolimus houi</i>          |
| AipsGOBP2 | AAP57462.1       | <i>Agrotis ipsilon</i>           |
| DsupGOBP2 | AGJ83351.1       | <i>Dendrolimus superans</i>      |
| HassGOBP2 | AAQ54909.1       | <i>Helicoverpa assulta</i>       |
| HvirGOBP2 | PCG76987.1       | <i>Heliothis viresence</i>       |
| SlitGOBP2 | XP_022817877.1   | <i>Spodoptera litura</i>         |
| MsepGOBP2 | AWT22242.1       | <i>Mythimna separata</i>         |
| AdisGOBP2 | ALJ93807.1       | <i>Athetis dissimilis</i>        |
| DkikGOBP2 | AGJ83353.1       | <i>Dendrolimus kikuchii</i>      |
| MbraGOBP2 | AAC05703.2       | <i>Mamestra brassicae</i>        |
| TniGOBP2  | XP_026739044.1   | <i>Trichoplusia ni</i>           |
| SnifGOBP2 | AHC72380.1       | <i>Sesamia inferens</i>          |
| MsexGOBP2 | XP_030025611.1   | <i>Manduca sexta</i>             |
| DtabGOBP2 | AGJ71277.1       | <i>Dendrolimus tabulaeformis</i> |
| OnubGOBP2 | BBB15978.1       | <i>Ostrinia nubilalis</i>        |
| GmelGOBP2 | QEI46781.1       | <i>Galleria mellonella</i>       |
| DhouGOBP2 | AGJ83354.1       | <i>Dendrolimus houi</i>          |
| HarmPBP1  | HQ436362.1       | <i>Helicoverpa armigera</i>      |
| HzeaPBP1  | AF090191.1       | <i>Helicoverpa zea</i>           |
| SexiPBP1  | AAS55551.2       | <i>Spodoptera exigua</i>         |
| HassPBP1  | AAW65077.1       | <i>Helicoverpa assulta</i>       |
| MsepPBP1  | BAG71416.1       | <i>Mythimna separata</i>         |

|          |            |                             |
|----------|------------|-----------------------------|
| SinfPBP1 | AEX58642.1 | <i>Sesamia inferens</i>     |
| AipsPBP1 | AFM36756.1 | <i>Agrotis ipsilon</i>      |
| AsegPBP1 | AAD41276.1 | <i>Agrotis segetum</i>      |
| AdisPBP1 | ALJ93809.1 | <i>Athetis dissimilis</i>   |
| OnubPBP1 | AAD39447.1 | <i>Ostrinia nubilalis</i>   |
| HarmPBP2 | AEB54583.1 | <i>Helicoverpa armigera</i> |
| HvirPBP2 | CAL48346.1 | <i>Heliothis virescens</i>  |
| HassPBP2 | ABY28381.2 | <i>Helicoverpa assulta</i>  |
| AipsPBP2 | AFM36757.1 | <i>Agrotis ipsilon</i>      |
| MsexPBP2 | AAF16710.1 | <i>Manduca sexta</i>        |
| AsegPBP2 | AAX85460.1 | <i>Agrotis segetum</i>      |
| SexiPBP2 | ABK41046.1 | <i>Spodoptera exigua</i>    |
| SexiPBP3 | ACY78413.1 | <i>Spodoptera exigua</i>    |
| SlitPBP3 | AIS72934.1 | <i>Spodoptera litura</i>    |
| HassPBP3 | ABB91374.1 | <i>Helicoverpa assulta</i>  |
| HarmPBP3 | AAO16091.1 | <i>Helicoverpa armigera</i> |
| AipsPBP3 | AFM36758.1 | <i>Agrotis ipsilon</i>      |
| SinfPBP3 | AEQ30020.1 | <i>Sesamia inferens</i>     |
| MsexPBP3 | AAF16703.1 | <i>Manduca sexta</i>        |
