# Supplementary material for: GOBP1 from the Variegated Cutworm Peridroma saucia (Hübner) (Lepidoptera: Noctuidae) Displays High Binding Affinities to the Behavioral Attractant (Z)-3-Hexenyl acetate
Source: MDPI journal article supplement (doi:10.3390/insects12100939), 2021-10-15
Supplement: s1 [file s1]

**Table S1.** Nucleotide primers used in this article.

| Primer name                             | Sequence (5'-3')                            |
|-----------------------------------------|---------------------------------------------|
| <b>Cloning CDS</b>                      |                                             |
| PsauGOBP1-F                             | ATGATGCAGGCGGTGCTAGTG                       |
| PsauGOBP1-R                             | TCACCGCGCCTCCGCCTCCAT                       |
| <b>RT-qPCR</b>                          |                                             |
| PsauGOBP1-F                             | CCACTTCAACCTGCTCACC                         |
| PsauGOBP1-R                             | AACTCGGTCATCTACATCTC                        |
| PsauActin-F                             | TCATCACCATCGGAAACGAAC                       |
| PsauActin-R                             | GCGTACAAGTCCTTACGGAT                        |
| <b>Recombinant PsauGOBP1 expression</b> |                                             |
| PsauGOBP1-F                             | CCC <u>CATATG</u> GCCGACGTCAACGTCATGAA<br>G |
| PsauGOBP1-R                             | AT <u>GAATTC</u> TCACCGCGCCTCCGCCT          |

F: forward primer; R: reverse primer; CDS: coding sequence; PsauActin:  $\beta$ -actin protein of *P. saucia*. Underlined showed the NdeI (CATATG) and EcoRI (GAATTC) restriction enzyme sites in the forward and reverse primer, respectively.
