# Supplementary material for: GOBP1 from the Variegated Cutworm Peridroma saucia (Hübner) (Lepidoptera: Noctuidae) Displays High Binding Affinities to the Behavioral Attractant (Z)-3-Hexenyl acetate
Source: MDPI journal article supplement (doi:10.3390/insects12100939), 2021-10-15
Supplement: s1 [file s1]

**Table S3.** Odorants for fluorescence binding assays of recombinant PsauGOBP1.

| Odorant                                | CAS number* | Purity (%) | Company        |
|----------------------------------------|-------------|------------|----------------|
| <b><i>P. saucia</i> sex pheromones</b> |             |            |                |
| Z11-16: Ac                             | 34010-21-4  | ≥91        | J&K Scientific |
| Z9-14: Ac                              | 16725-53-4  | ≥93        | J&K Scientific |
| <b>Other moth sex pheromones</b>       |             |            |                |
| Z11-16: Ald                            | 53939-28-9  | ≥95        | TCI            |
| Z9-16: Ald                             | 56219-04-6  | ≥95        | Fluorochem     |
| Z7-12: Ac                              | 14959-86-5  | ≥91        | J&K Scientific |
| Z9-12: Ac                              | 16974-11-1  | ≥93        | J&K Scientific |
| Z11-16: OH                             | 56683-54-6  | ≥91        | J&K Scientific |
| Z9-16: OH                              | 10378-01-5  | ≥98        | Sigma-Aldrich  |
| <b>Host plant volatiles</b>            |             |            |                |
| (Z)-3-hexenyl acetate                  | 3681-71-8   | ≥99        | J&K Scientific |
| (E)-2-hexenyl acetate                  | 2497-18-9   | ≥97        | TCI            |
| Methyl jasmonate                       | 39924-52-2  | ≥95        | Fluorochem     |
| Methyl salicylate                      | 119-36-8    | ≥99        | J&K Scientific |
| Phenylethyl acetate                    | 103-45-7    | ≥98        | TCI            |
| Octanal                                | 124-13-0    | ≥98        | TCI            |
| Decanal                                | 112-31-2    | ≥97        | TCI            |
| Nonanal                                | 124-19-6    | ≥95        | TCI            |
| Citral                                 | 5392-40-5   | ≥96        | TCI            |
| (E)-2-hexenal                          | 6728-26-3   | ≥97        | J&K Scientific |
| Benzaldehyde                           | 100-52-7    | ≥98        | J&K Scientific |
| Heptanol                               | 111-70-6    | ≥98        | TCI            |
| Farnesol                               | 4602-84-0   | ≥96        | J&K Scientific |
| (Z)-3-hexen-1-ol                       | 928-96-1    | ≥98        | J&K Scientific |
| (E)-2-hexen-1-ol                       | 928-95-0    | ≥96        | J&K Scientific |
| Dodecanol                              | 112-53-8    | ≥99        | TCI            |
| Linalool                               | 78-70-6     | ≥98        | J&K Scientific |
| β-myrcene                              | 123-35-3    | ≥90        | TRC            |
| β-pinene                               | 127-91-3    | ≥95        | J&K Scientific |
| D-Limonene                             | 5989-27-5   | ≥95        | Fluorochem     |
| (E)-β-farnesene                        | 18794-84-8  | ≥95        | Macklin        |
| β-ocimene                              | 13877-91-3  | ≥90        | TRC            |
| (E)-caryophyllene                      | 87-44-5     | ≥90        | TCI            |
| Jasmonic acid                          | 77026-92-7  | ≥90        | Sigma-Aldrich  |
| (Z)-jasmone                            | 488-10-8    | ≥93.5      | J&K Scientific |
| Indole                                 | 120-72-9    | ≥99        | J&K Scientific |

\*CAS number: chemical abstracts service number.
